# Supplementary material for: Prebiotic Oligosaccharides Potentiate Host Protective Responses against L. Monocytogenes Infection
Source: MDPI journal article supplement (doi:10.3390/pathogens6040068), 2017-12-19
Supplement: s1 [file s1]

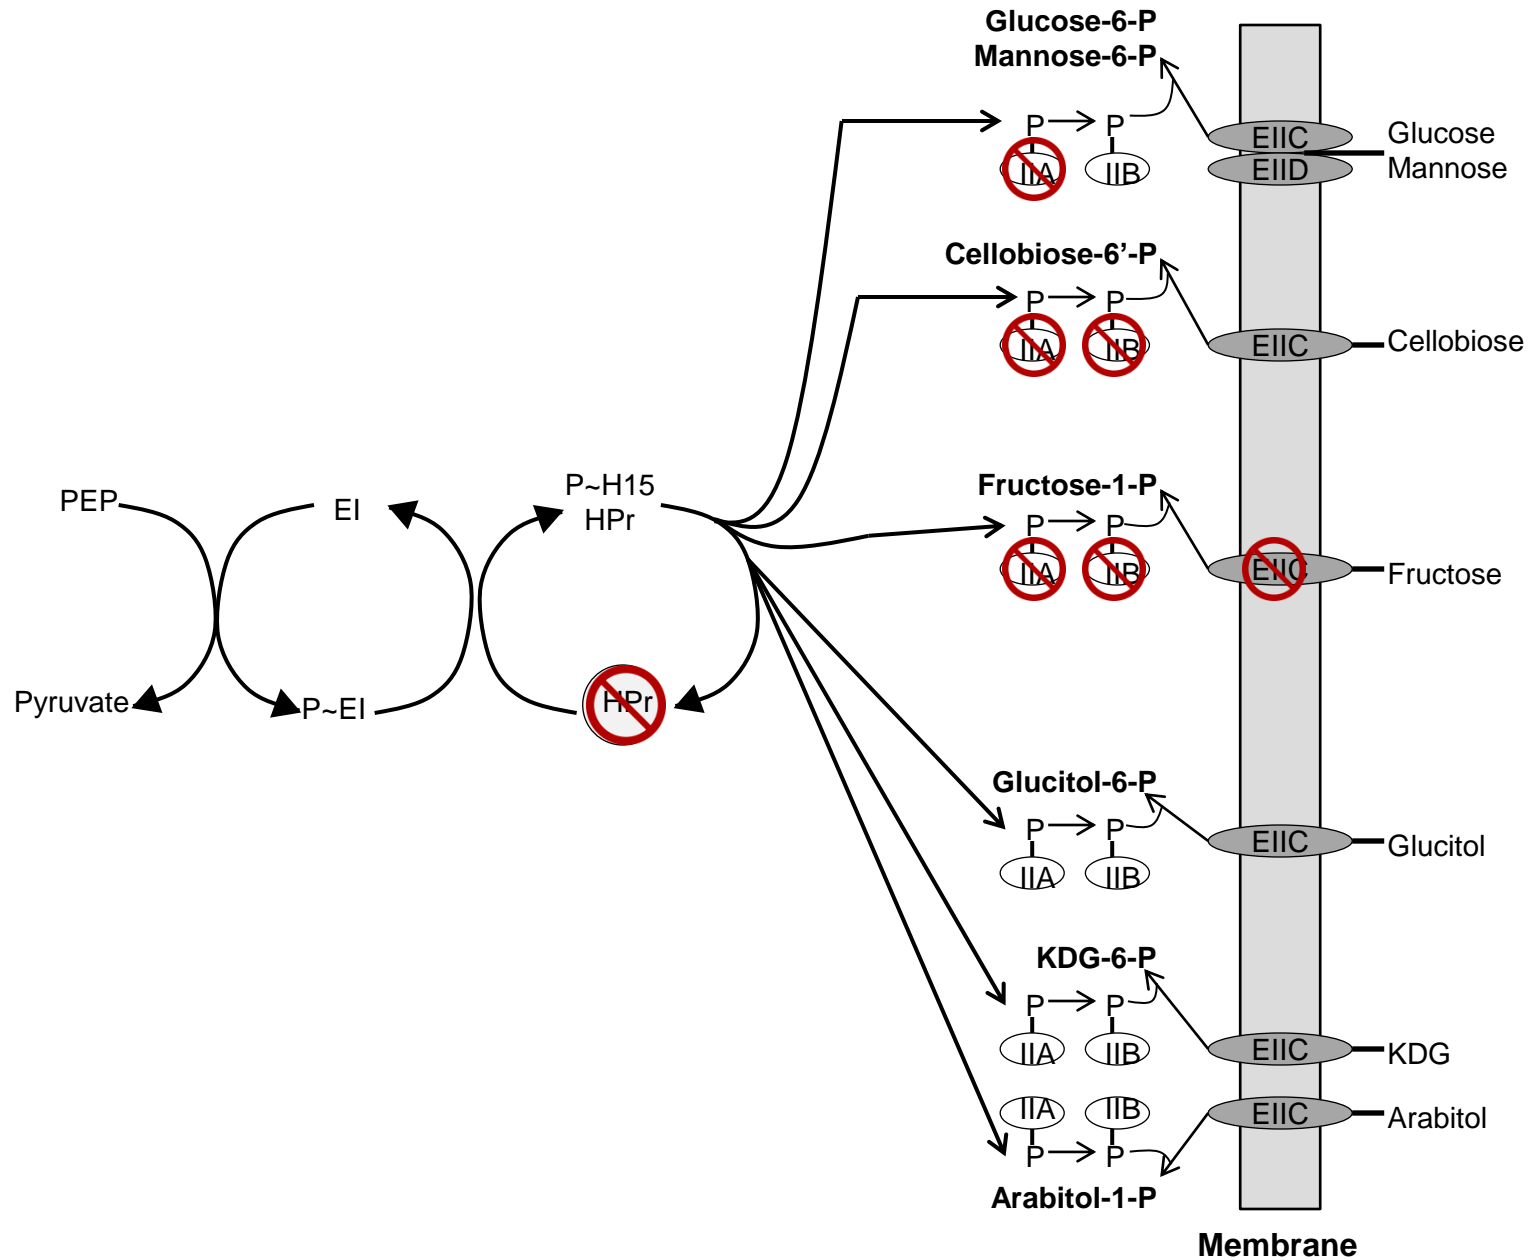

Supplementary Figure 1. Biomos-repressed *L. monocytogenes* sugar PTS and phosphotransferase genes during infection

## Effect of infection on cells pretreated with HMO

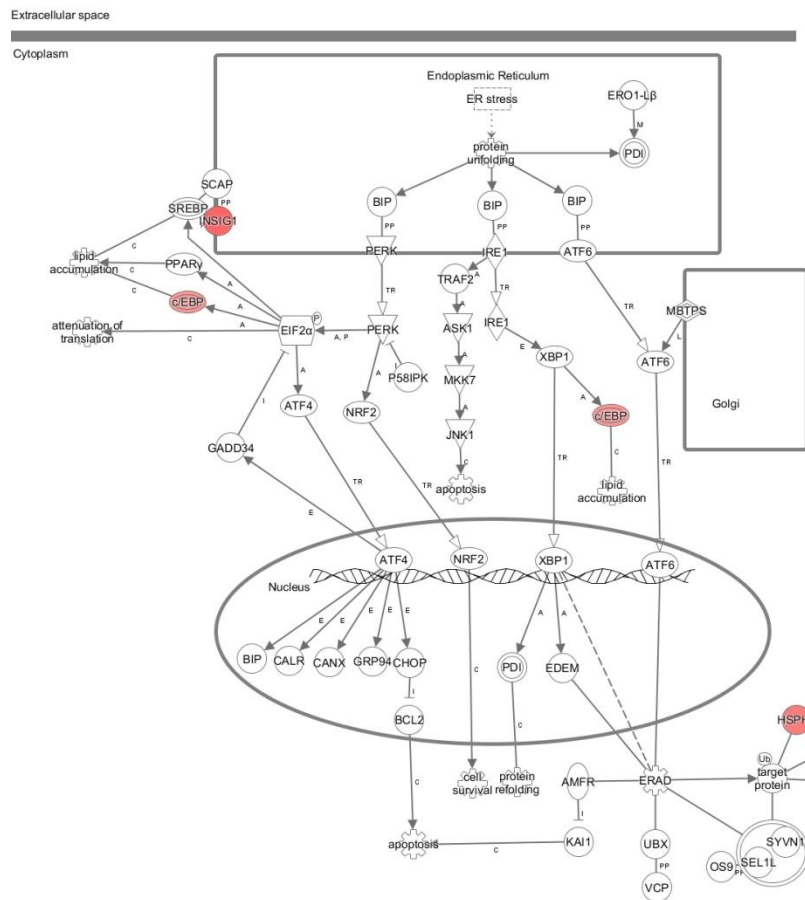

## Effect of infection on cells pretreated with Biomos

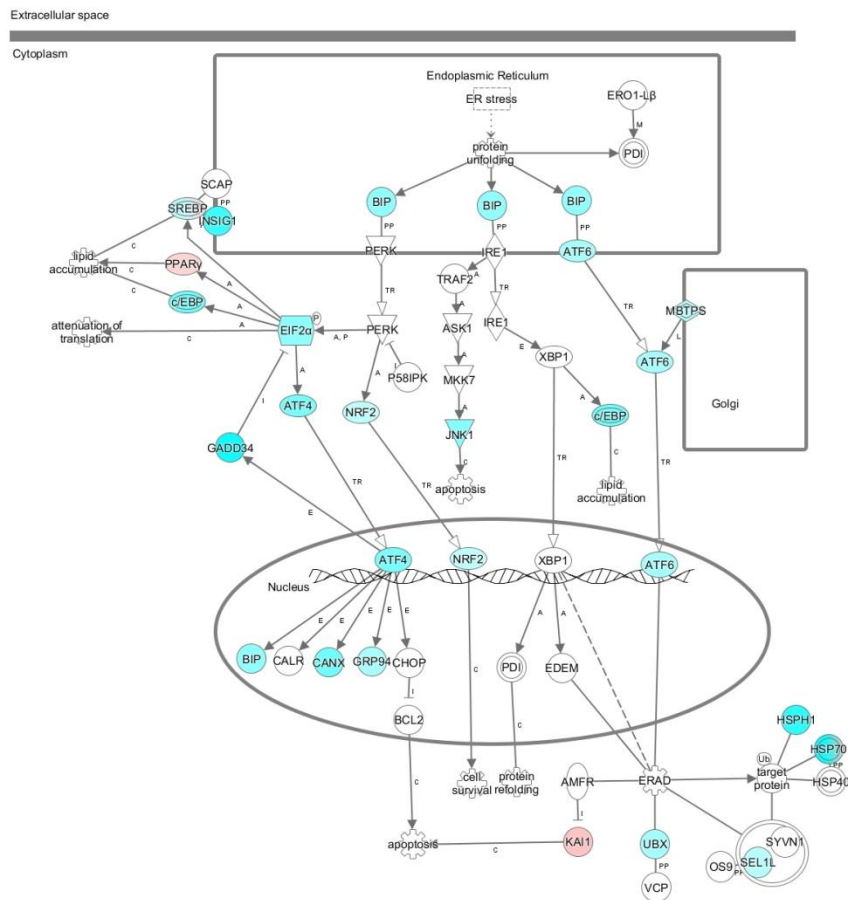

Supplementary Figure 2. Pathogen-induced differential Unfolded Protein Response signaling with oligosaccharide pretreatment.
