# Supplementary material for: Prebiotic Oligosaccharides Potentiate Host Protective Responses against L. Monocytogenes Infection
Source: Pathogens. 2017 Dec 19;6(4):68. doi: 10.3390/pathogens6040068 (PMC5750592; doi:10.3390/pathogens6040068)
Supplement: Supplementary file 1 [file pathogens-06-00068-s001.zip › supp data/Manuscript supplementary tables.xlsx]

## Sheet: Supp Table 1
Supplementary Table 1. Differential expression of host cell membrane receptors during infection
		HMO/+Lm			Biomos/+Lm
Gene	Ensembl ID	Log2 FC	P-value	FDR	Log2 FC	P-value	FDR
CHRNB2	ENSG00000160716	-1.367	0.000166	0.0299	0.906	0.000867	0.0052
CNTFR	ENSG00000122756	-1.127	0.00047	0.044	1.336	2.6e-09	2.85e-07
FLT4	ENSG00000037280	-1.183	0.00029	0.0379	1.273	4.2e-08	2.58e-06
NGFR	ENSG00000064300	-1.045	0.000319	0.0385	1.192	1.64e-06	4.26e-05
PROM2	ENSG00000155066	-1.149	0.000388	0.0416	1.405	3.22e-08	2.1e-06
ROBO3	ENSG00000154134	-1.214	0.000265	0.0372	1.392	3.05e-10	5.03e-08
UNC5A	ENSG00000113763	-1.214	0.000327	0.0388	1.194	2.17e-06	5.21e-05

## Sheet: Supp Table 2
Supplementary Table 2. Differential expression of host transcription factors during infection
		HMO/+Lm			Biomos/+Lm
Gene	Ensembl ID	Log2 FC	P-value	FDR	Log2 FC	P-value	FDR
FOS	ENSG00000170345	2.52	4.61e-08	0.000151504	-2.468	2.35e-13	1.43e-10
KLF6	ENSG00000067082	2.01	0.000158947	0.0295052	-1.625	8.79e-08	4.47e-06
NCOA7	ENSG00000111912	1.956	8.42e-06	0.00843121	-1.017	3.39e-06	7.25e-05
PSMD10	ENSG00000101843	1.912	2.57e-05	0.0134552	-2.668	2.61e-12	1e-09
KLF10	ENSG00000155090	1.658	7.91e-05	0.0196111	-1.521	4.54e-08	2.72e-06
CEBPG	ENSG00000153879	1.649	0.000135459	0.0281993	-1.108	1.18e-05	0.000185
NFYB	ENSG00000120837	1.5	2.97e-05	0.0145226	-1.689	4.69e-11	1.16e-08
ATF3	ENSG00000162772	1.422	0.000177964	0.0307998	-1.192	5.2e-09	5.09e-07
PTTG1	ENSG00000164611	1.37	1.62e-05	0.0100976	-1.21	2.79e-05	0.000364
JUNB	ENSG00000171223	1.319	0.000419355	0.0424633	-1.747	1.04e-07	5.05e-06
GATA2	ENSG00000179348	-1.033	0.000541324	0.0459786	0.87	0.00173	0.00879
TGFB1I1	ENSG00000140682	-1.053	0.000528468	0.0455778	0.81	0.00182	0.00911
IRF5	ENSG00000128604	-1.124	0.00027333	0.0374495	1.124	2.37e-06	5.57e-05
ATOH8	ENSG00000168874	-1.132	0.00030417	0.0383429	1.386	1.5e-08	1.17e-06
CELF4	ENSG00000101489	-1.146	0.000658681	0.0489699	1.328	1.32e-10	2.5e-08
LMX1B	ENSG00000136944	-1.185	0.000530585	0.0455778	1.349	2.73e-09	2.93e-07
HDAC7	ENSG00000061273	-1.203	0.000145552	0.0283926	1.286	1.82e-09	2.13e-07
FOXO6	ENSG00000204060	-1.221	0.000139485	0.0282094	1.264	4.95e-06	9.63e-05
HOXB2	ENSG00000173917	-1.232	0.000309835	0.0383429	1.088	0.000118	0.00111
OTX1	ENSG00000115507	-1.255	0.000330109	0.0387676	1.219	0.000583	0.00385
BRF2	ENSG00000104221	-1.277	0.000168775	0.0298836	0.806	0.00571	0.0217
SPDEF	ENSG00000124664	-1.321	7.49e-05	0.0191452	1.578	5.3e-08	3.05e-06
VSX2	ENSG00000119614	-1.331	2.64e-05	0.0134813	1.194	5.12e-05	0.000578
TBX2	ENSG00000121068	-1.335	0.000451433	0.04366	1.3	0.000184	0.00156
ZNF467	ENSG00000181444	-1.429	3.85e-06	0.00554218	0.883	0.00254	0.0117

## Sheet: Supp Table 3
Supplementary Table 3. Differential expression of genes unique to HMO/+Lm
Gene name	Ensembl ID	Log2 FC	P-value	FDR	Gene function
ASIC3	ENSG00000213199	-1.394	0.000132	0.0278	Cell membrane
CILP2	ENSG00000160161	-1.393	7.25e-05	0.0191
CLDN5	ENSG00000184113	-1.585	3.51e-05	0.0153
CTRB2	ENSG00000168928	-1.405	0.000375	0.0413
LRRTM2	ENSG00000146006	1.74	0.000516	0.0456
CD79B	ENSG00000007312	-1.317	0.000316	0.0385
LCAT	ENSG00000213398	-1.165	0.000428	0.043
PLA2G3	ENSG00000100078	-1.576	4.46e-05	0.0171	Metabolism
NDUFA3	ENSG00000170906	-1.107	0.000595	0.0476
APLN	ENSG00000171388	-1.79	5.14e-05	0.0171	Cell signaling
TBC1D3	ENSG00000274808	-1.262	0.000308	0.0383
MTRNR2L8	ENSG00000255823	1.414	3.33e-05	0.0153
TREHP1	ENSG00000255239	-1.423	0.000142	0.0282	Pseudogene
CROCCP1	ENSG00000225769	-1.513	0.000264	0.0372
TBC1D3P7	ENSG00000233014	-1.295	0.000346	0.0399
ZDBF2	ENSG00000204186	1.207	0.000658	0.049	Transcription factor DNA binding protein
ZNF860	ENSG00000197385	2.165	5.82e-06	0.00735
MAFB	ENSG00000204103	-1.168	0.000375	0.0413
PHF6	ENSG00000156531	1.272	0.000574	0.0468
CCDC116	ENSG00000161180	-1.607	0.000147	0.0284
PRR34	ENSG00000182257	-1.529	0.000297	0.0382
WDR38	ENSG00000136918	-1.384	0.000559	0.0463

## Sheet: Supp Table 4
Supplementary Table 4. Differential expression of cytokines unique to Biomos/+Lm
Gene name	Ensembl ID	Log2 FC	P-value	FDR
BMP8A	ENSG00000183682	0.905	7.1e-05	0.000745
CCL24	ENSG00000106178	0.89	0.00139	0.00742
CLCF1	ENSG00000175505	0.614	0.0102	0.0335
CMTM3	ENSG00000140931	1.046	0.000219	0.00179
CMTM6	ENSG00000091317	-1.063	0.000155	0.00137
CSF1	ENSG00000184371	1.334	1.12e-06	3.18e-05
CTF1	ENSG00000150281	0.666	0.00498	0.0196
CXCL12	ENSG00000107562	0.736	0.00206	0.01
DKK3	ENSG00000050165	0.78	9.77e-05	0.000962
FAM3C	ENSG00000196937	-0.499	0.0127	0.0398
FAM3D	ENSG00000198643	0.924	1.55e-05	0.000231
FBRS	ENSG00000156860	0.844	0.000124	0.00115
IL17B	ENSG00000127743	0.819	0.000133	0.00122
IL1RN	ENSG00000136689	0.686	0.00322	0.0141
IL4	ENSG00000113520	0.755	0.00568	0.0216
NAMPT	ENSG00000105835	-2.363	1.3e-12	5.87e-10
SCGB1A1	ENSG00000149021	0.777	0.0043	0.0176
SPRED3	ENSG00000188766	0.965	0.000761	0.00471
THPO	ENSG00000090534	1.47	2.24e-07	9.16e-06
TNFSF15	ENSG00000181634	-0.685	0.0112	0.0361
WNT3A	ENSG00000154342	0.79	0.000129	0.00118
WNT4	ENSG00000162552	1.325	2.06e-07	8.69e-06
WNT5A	ENSG00000114251	0.881	0.000449	0.00314
WNT7A	ENSG00000154764	0.976	5.47e-07	1.87e-05

## Sheet: Supp Table 5
Treatment	Gene locus	Gene ID	Annotation	log2FC	logCPM	P-value	FDR
HMO*	lmo0758		hypothetical protein	0.244713	9.99749	0.000118847	0.0845003
Biomos	lmo1573	accD	acetyl-CoA carboxylase subunit beta	-1.9713	10.8841	0.00209923	0.0124887
	lmo2268	addB	ATP-dependent deoxyribonuclease subunit B	-1.5291	12.8953	0.00493527	0.0211157
	lmo1928	aroF	chorismate synthase	-1.34184	11.2279	0.00376839	0.0181193
	lmo1897	aspB	aspartate aminotransferase	-2.31574	11.1988	0.000359283	0.00355235
	lmo2533	atpF	ATP synthase F0F1 subunit B	-2.02586	10.8268	0.0169388	0.0497981
	lmo1316	cdsA	phosphatidate cytidylyltransferase	-1.76077	10.6603	0.00351722	0.0176363
	lmo1192	cobD	cobalamin biosynthesis protein	-10.8071	10.6179	2.43e-06	7.12e-05
	lmo1550	comC	competence protein	-10.4793	10.2472	0.000120967	0.00176915
	lmo0238	cysE	serine O-acetyltransferase	-1.64417	10.5041	0.0138504	0.0433652
	lmo1561	dnaB	chromosome replication initiation / membrane attachment protein	-11.3336	11.0972	1.95e-06	6.49e-05
	lmo1560	dnaI	primosomal protein	-1.77464	10.6875	0.00200998	0.0122696
	lmo1801	ffh	signal recognition particle protein	-2.71155	11.5641	0.00010008	0.00156125
	lmo1802		DNA-binding protein	-9.59897	9.41014	0.00660777	0.0255544
	lmo2507	ftsE	cell division protein	-1.95891	10.8313	0.00167899	0.0107906
	lmo1755	gatA	aspartyl/glutamyl-tRNA amidotransferase subunit A	-2.46683	12.761	0.00420221	0.0194076
	lmo1014	gbuA	glycine/betaine ABC transporter ATP-binding protein	-11.2441	11.0127	8.51e-08	9.96e-06
	lmo1557	hemA	glutamyl-tRNA reductase	-2.2025	11.0786	0.000502927	0.0047074
	lmo2212	hemE	uroporphyrinogen decarboxylase	-1.19335	11.0762	0.00254913	0.0145487
	lmo1325	infB	translation initiation factor IF-2	-2.20408	12.5701	0.00557754	0.0230293
	lmo1377	lisR	two-component response regulator	-1.42706	10.4133	0.004131	0.0192051
	lmo0115	lmaD	hypothetical protein	-10.2835	10.0516	0.000337753	0.00342718
	lmo0021		PTS fructose transporter subunit IIA	-1.57928	10.5191	0.00350723	0.0176363
	lmo0026	cutC	copper homeostasis protein	-10.8905	10.6283	6.47e-06	0.000146708
	lmo0048	argB	sensor histidine kinase	-11.0085	10.7869	1.11e-06	4.42e-05
	lmo0052		hypothetical protein (in an operon with dnaC)	-3.74341	12.5166	2.03e-06	6.49e-05
	lmo0060		hypothetical protein (in an 11 gene operon)	-1.3925	11.2746	0.00207997	0.0124887
	lmo0066		toxin	-3.3328	12.1455	8.49e-06	0.000181103
	lmo0089		ATP synthase subunit delta	-2.17201	11.0331	0.00233919	0.0136843
	lmo0094		hypothetical protein	-9.00968	8.86262	0.0166704	0.0495873
	lmo0102		hypothetical protein	-9.80206	9.62515	0.0010671	0.00817542
	lmo0126		hypothetical protein	-1.71382	10.6091	0.00552254	0.0229398
	lmo0148		hypothetical protein	-9.55218	9.41921	0.001872	0.0115276
	lmo0153		zinc ABC transporter substrate-binding protein	-2.24307	11.1053	0.0010252	0.0079966
	lmo0154		zinc ABC transporter ATP-binding protein	-1.9015	10.7526	0.00637698	0.0252917
	lmo0162		DNA polymerase III subunit delta	-0.737931	11.2276	0.00924499	0.0319704
	lmo0167		hypothetical protein	-8.95218	8.8272	0.0167638	0.0496549
	lmo0174		transposase (mediates IS30 transpsition)	-10.4281	10.1949	0.000109742	0.00163913
	lmo0179		sugar ABC transporter permease (in an operon with xylose repressor and an two alpha-glucosidases and an oligo-1-6-glucosidase	-11.2774	11.0548	3.79e-07	2.46e-05
	lmo0252		penicilinase repressor	-10.5604	10.4331	2.62e-06	7.29e-05
	lmo0279		anaerobic ribonucleoside triphosphate reductase	-2.25411	12.078	0.00154567	0.0103339
	lmo0288		two-component sensor histidine kinase	-3.03029	11.8634	7.32e-05	0.00119513
	lmo0305		L-allo-threonine aldolase (catalyzes gly + acetaldehyde) and is a homologue to glyA	-9.27129	9.12015	0.00707252	0.0262694
	lmo0311		hypothetical protein	-2.10731	10.974	0.00161289	0.0105817
	lmo0347		dihydroxyacetone kinase	-1.54419	10.436	0.00945904	0.0324077
	lmo0358		PTS fructose transporter subunit IIBC	-2.72891	11.5799	7.23e-05	0.00119513
	lmo0372		beta-glucosidase	-1.74749	11.6045	0.00135487	0.00949344
	lmo0383		methylmalonate-semialdehyde dehydrogenase (Val catabolism)	-11.4267	11.2006	5.51e-08	9.68e-06
	lmo0391		hypothetical protein	-10.9141	10.6474	6.9e-05	0.00118202
	lmo0403		hypothetical protein	-10.338	10.1298	0.00016896	0.00214951
	lmo0416		transcriptional regulator	-9.72788	9.60559	0.000772945	0.00673252
	lmo0421	rodA	rod shape-determining protein	-9.19046	9.05398	0.0063002	0.0252093
	lmo0428		PTS fructose transporter subunit IIC	-2.3157	11.191	0.000259828	0.00278334
	lmo0431		acetyltransferase	-10.2853	10.0614	0.000253553	0.00278116
	lmo0456		permease	-1.82216	11.6781	0.0138991	0.0433652
	lmo0513		hypothetical protein	-1.2373	10.1917	0.0152852	0.0460525
	lmo0527		transmembrane protein	-2.53625	11.3886	0.000288823	0.00298167
	lmo0529		glucosaminyltransferase	-2.1129	10.9678	0.00167123	0.0107906
	lmo0599		hypothetical protein (in an operon with a cell surface protein)	-9.92523	9.7481	0.000888144	0.00708497
	lmo0667		ABC transporter ATP-binding protein	-1.96714	10.8367	0.00181989	0.0114068
	lmo0677	fliQ	flagellar biosynthesis protein	-10.4523	10.2571	3.09e-05	0.000586378	in the same operon
	lmo0685	motA	flagellar motor protein (interacts with cheV)	-1.83025	10.7118	0.00327387	0.017104
	lmo0688		hypothetical protein (in the fli operon)	-1.79239	11.2407	0.00134892	0.00949344
	lmo0692	cheA	two-component sensor histidine kinase	-11.6733	11.4239	3.35e-08	7.85e-06
	lmo0703		hypothetical protein (regulates fli and che)	-9.86191	9.69243	0.000807401	0.00673252	this is really inportant - motility and flagella
	lmo0704		hypothetical protein	-9.66735	9.44942	0.00493463	0.0211157
	lmo0705	flgK	flagellar hook-associated protein	-2.27742	11.1349	0.000805387	0.00673252
	lmo0706	flgL	flagellar hook-associated protein	-1.54035	10.4318	0.0105882	0.0347334
	lmo0707	fliD	flagellar capping protein	-1.19924	11.0847	0.00406395	0.0190193
	lmo0710	flgB	flagellar basal-body rod protein	-10.2959	10.0316	0.000827531	0.00673252
	lmo0713	fliF	flagellar MS-ring protein	-1.96809	11.8166	0.00835821	0.0297841
	lmo0718		hypothetical protein	-1.67866	10.5593	0.0122919	0.0397646
	lmo0719		hypothetical protein	-10.0406	9.9168	9.09e-05	0.0014502
	lmo0724		hypothetical protein	-2.44945	10.3159	0.014213	0.043761
	lmo0735		ribulose-5-phosphate 3-epimerase	-1.60363	10.4795	0.0130284	0.0414521
	lmo0755		hypothetical protein	-1.51278	10.4811	0.00327968	0.017104
	lmo0758		hypothetical protein	-10.4847	10.2152	0.000213591	0.00245805
	lmo0767		ABC transporter permease	-10.8342	10.601	6.07e-06	0.000146708
	lmo0784		PTS mannose transporter subunit IIB	-1.37187	10.3448	0.00680174	0.0255544
	lmo0807		spermidine/putrescine ABC transporter ATP-binding protein	-1.21807	11.1129	0.00365919	0.0181193
	lmo0834		hypothetical protein	-10.5242	10.3281	3.4e-05	0.000628919
	lmo0847		glutamine ABC transporter	-1.62115	11.4904	0.000800895	0.00673252
	lmo0853	sugE	SugE protein	-10.5475	10.257	0.00022054	0.00249482
	lmo0862		oligo-1,6-glucosidase	-1.56857	11.4319	0.00136586	0.00949344
	lmo0864		hypothetical protein	-1.92543	10.7843	0.00460275	0.0207124
	lmo0877		glucosamine-6-phosphate isomerase	-1.51335	10.4468	0.00730566	0.0269925
	lmo0914		PTS sugar transporter subunit IIB	-9.79524	9.56768	0.00287964	0.015793
	lmo0916		PTS sugar transporter subunit IIA	-9.73874	9.51027	0.00562131	0.0230293
	lmo0917		beta-glucosidase	-2.21794	11.0808	0.00157559	0.0104346
	lmo0935		rRNA methylase	-2.0418	10.0026	0.00966069	0.0326048
	lmo0945	comEC	competence protein	-2.02324	10.8748	0.003405	0.0175758
	lmo0960		protease	-1.68462	10.5622	0.00833451	0.0297841
	lmo0979		daunorubicin resistance ATP-binding protein	-1.68548	10.5905	0.00486448	0.0210858
	lmo0983		glutathione peroxidase	-9.56408	9.37247	0.00482676	0.0210858
	lmo1004		hypothetical protein	-2.24341	11.1089	0.000784543	0.00673252
	lmo1009		hypothetical protein	-10.2365	9.98894	0.000468096	0.00444059
	lmo1020		hypothetical protein	-1.61038	10.5086	0.00784817	0.0285462
	lmo1032		transketolase	-10.8033	10.5781	6.48e-06	0.000146708
	lmo1037		hypothetical protein	-10.6497	10.4406	1.37e-05	0.000282396
	lmo1040		molybdenum ABC transporter permease	-1.50626	10.4094	0.0135794	0.0427479
	lmo1042	moeA	molybdopterin biosynthesis protein	-2.14984	11.01	0.00111344	0.00840468
	lmo1057		L-lactate dehydrogenase	-11.3562	11.1029	3.83e-06	9.97e-05
	lmo1075		teichoic acid ABC transporter ATP-binding protein	-10.87	10.6225	5.89e-06	0.000146708
	lmo1082		dTDP-sugar epimerase	-1.71393	10.6401	0.00399824	0.0188373
	lmo1093	nadE	NAD synthetase	-2.32466	10.3049	0.00209911	0.0124887
	lmo1095		PTS cellbiose transporter subunit IIB	-9.79479	9.68443	0.000288765	0.00298167
	lmo1107		hypothetical protein	-10.0133	9.77663	0.00213926	0.0126198
	lmo1108		hypothetical protein	-10.4605	10.2946	1.77e-05	0.000350311
	lmo1119		methylase	-1.73251	10.6538	0.00398745	0.0188373
	lmo1126		hypothetical protein	-10.6936	10.5341	1.64e-06	5.75e-05
	lmo1146		hypothetical protein	-1.81859	10.6671	0.00655467	0.0255544
	lmo1164	pduO	ATP:cob(I)alamin adenosyltransferase	-1.85779	10.7111	0.0056425	0.0230293
	lmo1172		two-component response regulator	-1.56234	10.4566	0.010162	0.033809
	lmo1178		carboxysome structural protein	-10.5247	10.2536	0.000206884	0.00242054
	lmo1181		cobalamin adenosyl transferase	-1.40287	10.3296	0.0128569	0.0412126
	lmo1182	pduL	threonine degradation I	-10.2886	10.0807	0.000180302	0.00222056
	lmo1186	eutH	ethanolamine utilization protein	-2.21594	11.0712	0.00107142	0.00817542
	lmo1229		hypothetical protein	-9.68167	9.47897	0.00375654	0.0181193
	lmo1238	rph	ribonuclease PH	-1.54055	10.4833	0.00550099	0.0229398
	lmo1250		antibiotic resistance protein	-11.1891	10.9722	4.45e-07	2.57e-05
	lmo1296		hypothetical protein	-11.2017	10.9442	5.49e-07	2.57e-05
	lmo1309		hypothetical protein	-10.3798	10.12	0.000261682	0.00278334
	lmo1345	comGC	competence protein	-9.9164	9.66628	0.00254269	0.0145487
	lmo1352		hypothetical protein	-9.64354	9.46088	0.00368482	0.0181193
	lmo1357		acetyl-CoA carboxylase biotin carboxylase subunit	-1.45288	11.3385	0.00451789	0.0205945
	lmo1392		peptidase	-2.16751	11.0654	0.000415471	0.00405084
	lmo1418		hypothetical protein	-1.85556	10.7052	0.00608827	0.024563
	lmo1421		glycine/betaine ABC transporter ATP-binding protein	-1.84298	10.7409	0.00327736	0.017104
	lmo1436		aspartate kinase	-2.26144	11.1106	0.00296575	0.0161392
	lmo1437		aspartate-semialdehyde dehydrogenase	-11.0134	10.8108	2.7e-06	7.29e-05
	lmo1453		hypothetical protein	-10.5846	10.3432	5.94e-05	0.00105372
	lmo1462	era	GTP-binding protein	-8.9184	8.82588	0.012166	0.0395395
	lmo1463		cytidine deaminase	-10.0604	9.9041	0.000190476	0.00226634
	lmo1488	nadD	nicotinic acid mononucleotide adenylyltransferase	-1.3552	10.3529	0.00351514	0.0176363
	lmo1490		shikimate 5-dehydrogenase	-0.892464	10.827	0.00746774	0.0273039
	lmo1505		ABC transporter ATP-binding protein	-10.3237	10.1007	0.000186783	0.00226071
	lmo1506		transporter	-2.19332	11.061	0.000808001	0.00673252
	lmo1507		response regulator	-10.473	10.3146	1.8e-05	0.000350311
	lmo1593	nifS	iron-sulfur cofactor synthesis protein	-2.1145	11.0087	0.000436052	0.00419327
	lmo1616		hypothetical protein	-1.47444	10.4227	0.00588278	0.0238712
	lmo1618		MarR family transcriptional regulator	-10.014	9.80021	0.00133614	0.00949344
	lmo1623		hypothetical protein	-1.45523	10.4355	0.00328923	0.017104
	lmo1624		hypothetical protein	-1.64861	11.5141	0.0163084	0.048717
	lmo1636		ABC transporter ATP-binding protein	-1.84732	10.7521	0.00310304	0.0167189
	lmo1639		DNA-3-methyladenine glycosidase	-10.2714	10.0836	0.000124315	0.001781
	lmo1640		hypothetical protein	-9.31459	9.16855	0.00475355	0.0210858
	lmo1652		ABC transporter ATP-binding protein	-1.78946	12.1573	0.0149566	0.0452567
	lmo1661		hypothetical protein	-0.968129	10.888	0.00805117	0.0290714
	lmo1691		deoxyuridine triphosphate nucleotidohydrolase	-10.269	10.0049	0.000834372	0.00673252
	lmo1693	recX	recombination regulator	-1.80398	10.7334	0.00183848	0.0114213
	lmo1733	gltD	glutamate synthase subunit beta	-2.35561	14.9545	0.00666901	0.0255544
	lmo1747		ABC transporter ATP-binding protein	-0.907277	10.8063	0.00847087	0.0299553
	lmo1796		hypothetical protein	-9.4365	9.29577	0.00284605	0.015793
	lmo1827	gmk	guanylate kinase	-10.5154	10.245	0.0001579	0.0020527
	lmo1852		mercury-binding protein	-9.41645	9.23562	0.00663423	0.0255544
	lmo1854		hypothetical protein	-9.44746	9.27042	0.00480143	0.0210858
	lmo1869		hypothetical protein	-10.9752	10.7564	1.13e-06	4.42e-05
	lmo1874	thyA	thymidylate synthase	-10.8464	10.6898	5.16e-07	2.57e-05
	lmo1875		ABC transporter ATP-binding protein	-1.67102	11.5368	0.0143537	0.0440012
	lmo1908		hypothetical protein	-9.88095	9.63147	0.00371261	0.0181193
	lmo1915		malate dehydrogenase	-2.66908	11.5238	0.000171471	0.00214951
	lmo1930		heptaprenyl diphosphate synthase subunit II	-1.7581	10.6709	0.0043668	0.0200359
	lmo1931	menH (aka ubiE)	ubiquinone/menaquinone biosynthesis methyltransferase	-1.40217	10.3199	0.014138	0.043761
	lmo1943		hypothetical protein	-11.1	10.8671	8.62e-07	3.78e-05
	lmo1964		ABC transporter ATP-binding protein	-1.83821	10.7129	0.00347821	0.0176363
	lmo1966		hypothetical protein	-1.91366	10.8365	0.00133409	0.00949344
	lmo1973		PTS sugar transporter subunit IIA	-1.37853	10.3545	0.00632028	0.0252093
	lmo1999		hypothetical protein	-2.1623	11.0621	0.000604089	0.00557987
	lmo2021		hypothetical protein	-10.1927	10.0156	0.00014445	0.00195007
	lmo2022		carbon-sulfur lyase	-2.94893	10.7893	0.00135852	0.00949344
	lmo2041	mraW	S-adenosyl-methyltransferase	-1.71271	10.5637	0.00946378	0.0324077
	lmo2078		hypothetical protein	-10.469	10.2332	0.00013585	0.00186994
	lmo2084		hypothetical protein	-1.87199	10.7308	0.0114945	0.0375308
	lmo2095		phosphofructokinase	-0.976323	10.8895	0.00501768	0.0212193
	lmo2099		transcriptional antiterminator	-1.87662	11.7309	0.0102873	0.0339045
	lmo2101	pdxS	pyridoxal biosynthesis lyase	-2.06868	10.9225	0.00959089	0.0325256
	lmo2120		hypothetical protein	-1.75028	10.6514	0.00241114	0.0139886
	lmo2138		transcriptional regulator	-3.3274	11.1945	0.000106195	0.00162063
	lmo2141		hypothetical protein	-10.0525	9.91037	0.000127779	0.00179401
	lmo2152		thioredoxin	-8.98947	8.91295	0.00496309	0.0211157
	lmo2162		hypothetical protein	-1.68752	10.598	0.00686129	0.0256204
	lmo2172		propionate CoA-transferase	-1.63445	11.4994	0.0169541	0.0497981
	lmo2184		ferrichrome ABC transporter substrate-binding protein	-11.2123	10.9547	4.76e-07	2.57e-05
	lmo2193		peptide ABC transporter ATP-binding protein	-2.22306	12.9053	0.00922884	0.0319704
	lmo2200		MarR family transcriptional regulator	-1.63528	10.5599	0.0065113	0.0255359
	lmo2228		hypothetical protein	-9.40032	9.19878	0.0128295	0.0412126
	lmo2239		hypothetical protein	-8.74353	8.67669	0.0084916	0.0299553
	lmo2247		oxidoreductase	-2.05214	10.9401	0.00122913	0.00908371
	lmo2249		low-affinity inorganic phosphate transporter	-1.81564	10.6937	0.00677678	0.0255544
	lmo2295		protein gp8	-10.2631	10.0388	0.000341742	0.00342718
	lmo2297		scaffolding protein	-1.64224	10.5073	0.0142107	0.043761
	lmo2307		hypothetical protein	-9.64042	9.50236	0.0014916	0.0100683
	lmo2337	deoR	family transcriptional regulator	-0.868268	10.7525	0.0146731	0.0445911
	lmo2340		hypothetical protein	-9.01107	8.89008	0.0087246	0.0306234
	lmo2341		sugar kinase	-2.29987	11.1601	0.000830472	0.00673252
	lmo2355		multidrug resistance protein	-1.03763	11.5004	0.00376383	0.0181193
	lmo2363		glutamate decarboxylase	-1.54424	11.4123	0.00277979	0.0156113
	lmo2378		monovalent cation/H+ antiporter subunit A	-1.96478	12.3637	0.0017437	0.0110277
	lmo2414		aminotransferase	-1.91385	11.7323	0.0134235	0.0424473
	lmo2422		two-component response regulator	-1.8186	10.6773	0.00955384	0.0325256
	lmo2464		transcriptional regulator	-1.67643	10.5663	0.00680723	0.0255544
	lmo2481	ppaX	pyrophosphatase	-0.965656	10.8802	0.00650743	0.0255359
	lmo2521	tagA	N-acetylglucosaminyldiphosphoundecaprenol N-acetyl-beta-D-mannosaminyltransferase	-2.08876	10.9564	0.00138113	0.0095054
	lmo2550		glycosyl transferase	-2.25502	11.1108	0.000920381	0.00725963
	lmo2578		hypothetical protein	-1.82259	10.6946	0.00471339	0.0210752
	lmo2579		hypothetical protein	-9.65063	9.44346	0.00543766	0.0228577
	lmo2581		hypothetical protein	-11.3251	11.0729	3.85e-07	2.46e-05
	lmo2583		DNA-binding response regulator	-1.62419	10.4873	0.0159148	0.0477444
	lmo2648		phosphotriesterase	-1.94749	10.8147	0.00311991	0.0167189
	lmo2651		PTS mannitol transporter subunit IIA	-1.43864	10.3624	0.0100349	0.0335451
	lmo2696		dihydroxyacetone kinase	-1.56908	10.508	0.00381315	0.0182097
	lmo2707		hypothetical protein	-9.95279	9.77623	0.000685774	0.00625212
	lmo2749		glutamine amidotransferase	-1.62875	10.5264	0.0080754	0.0290714
	lmo2751		ABC transporter ATP-binding protein	-2.04364	11.8829	0.000223894	0.00249482
	lmo2752		ABC transporter ATP-binding protein	-9.13209	9.00619	0.00916326	0.0319704
	lmo2764		ROK family transcriptional regulator	-0.948671	10.8598	0.00672881	0.0255544
	lmo2771		beta-glucosidase	-9.19129	9.01334	0.0130497	0.0414521
	lmo2775		bacteriocin transporter	-1.49086	12.3257	0.00996621	0.033475
	lmo2817		peptidase	-1.49267	11.3582	0.00286397	0.015793
	lmo2819		carboxypeptidase	-1.61484	11.4797	0.000772164	0.00673252
	lmo2823	spoOJ	sporulation protein	-1.74664	11.6027	0.0146104	0.0445911
	lmo2835		xylose isomerase	-1.92584	10.7839	0.00258244	0.0146199
	lmo2836		alcohol dehydrogenase	-11.4836	11.2326	1.78e-07	1.56e-05
	lmo2840		sucrose phosphorylase	-11.7994	11.5417	2.32e-08	7.85e-06
	lmo2846		hypothetical protein	-10.1299	10.002	6e-05	0.00105372
	lmo2854	spoJ	sporulation protein	-1.55916	11.4332	0.00169083	0.0107906
	lmo1672	menE	O-succinylbenzoic acid--CoA ligase	-2.11688	11.9039	0.0102841	0.0339045
	lmo1547	mreC	rod shape-determining protein	-11.3433	11.1067	1.55e-06	5.72e-05
	lmo1902	panB	3-methyl-2-oxobutanoate hydroxymethyltransferase	-11.0898	10.8886	2.33e-07	1.82e-05
	lmo2501	phoP	two-component response phosphate regulator	-10.8321	10.5913	8.51e-06	0.000181103
	lmo1002	ptsH	phosphocarrier protein HPr	-9.97651	9.84693	0.000155794	0.0020527
	lmo1767	purM	phosphoribosylaminoimidazole synthetase	-11.3602	11.1386	7.71e-08	9.96e-06
	lmo1834	pyrDII	dihydroorotate dehydrogenase electron transfer subunit	-1.3795	10.361	0.00454786	0.0205974
	lmo2631	rplD	50S ribosomal protein L4	-2.92027	11.6876	0.00148976	0.0100683
	lmo2613	rplO	50S ribosomal protein L15	-2.63992	12.3593	0.00486594	0.0210858
	lmo2614	rpmD	50S ribosomal protein L30	-3.28541	11.0064	0.00743262	0.0273039
	lmo2825	serC	phosphoserine aminotransferase	-11.6759	11.429	2.67e-08	7.85e-06
	lmo0224	sul	dihydropteroate synthases	-10.9842	10.7601	2.22e-06	6.77e-05
	lmo2457	tpi	triosephosphate isomerase	-2.32706	11.1948	0.00122928	0.00908371
	lmo1633	trpE	anthranilate synthase subunit alpha	-11.3986	11.1474	1.5e-07	1.5e-05

## Sheet: Sheet1
	CdpA (599 aa)
	Family	Alignment (aa)	Bit score	E-value
	SLAP	136-193	48.8	7.4e-13
	SLAP	224281	48.1	1.2e-12
	SLAP	292-342	49.6	4.1e-13
	FIVAR	467-534	37.5	2.9e-09
	LBA002 (282 aa)
	Family	Alignment (aa)	Bit score	E-value
	SLAP	221-277	45.7	6.7e-12
